# Supplementary material for: Nurse-performed screening for postextubation dysphagia: a retrospective cohort study in critically ill medical patients
Source: Springer Nature journal article supplement (doi:10.1186/s13054-016-1507-y), 2016-10-12

**Nurse-Performed Screening for Post-Extubation Dysphagia:  
A Before-And-After Study in Critically-Ill Medical Patients**

See KC<sup>1,2</sup>, Peng SY<sup>2</sup>, Phua J<sup>1,2</sup>, Sum CL<sup>3</sup>, Concepcion J<sup>4</sup>

<sup>1</sup>Division of Respiratory & Critical Care Medicine, University Medicine Cluster, National University Health System, Singapore

<sup>2</sup>Yong Loo Lin School of Medicine, National University of Singapore, Singapore

<sup>3</sup>Department of Nursing, National University Hospital, Singapore

<sup>4</sup>Department of Rehabilitation, National University Hospital, Singapore

### Post-Extubation Dysphagia Screening Form

Patient details  
Please paste sticky label  
here

|                |   |   |   |
|----------------|---|---|---|
| Day            | 1 | 2 | 3 |
| Passed/ Failed |   |   |   |

Ward/ Bed No.: \_\_\_\_\_

Date/Time: \_\_\_\_\_

Qualified RN's Name & Signature: \_\_\_\_\_

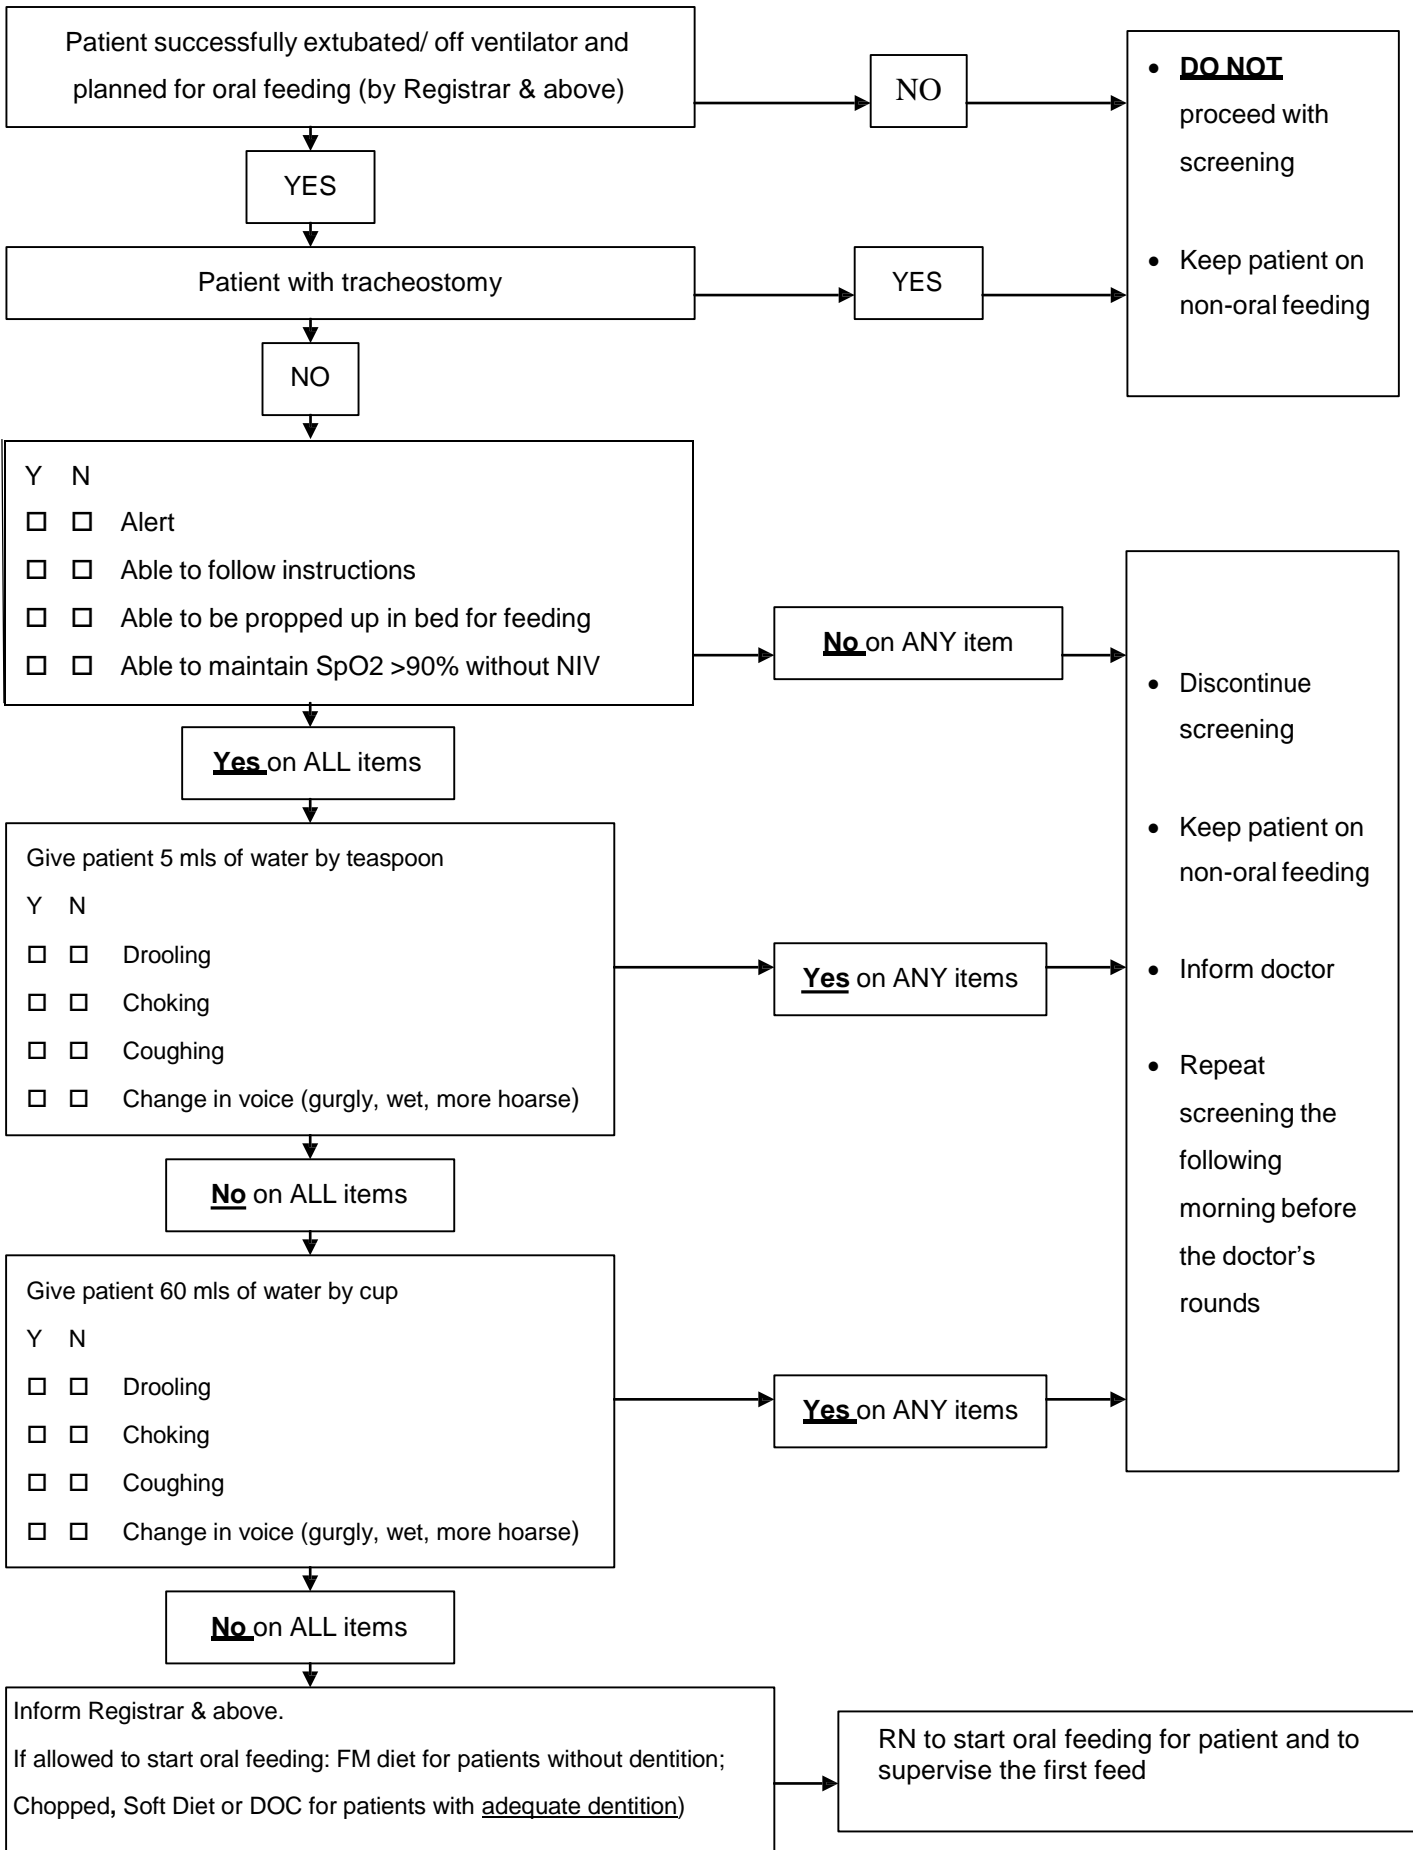

Supplement: MOESM2 [file 10870350]
