# Supplementary material for: Nurse-performed screening for postextubation dysphagia: a retrospective cohort study in critically ill medical patients
Source: Springer Nature journal article supplement (doi:10.1186/s13054-016-1507-y), 2016-10-12
Supplement: MOESM3 [file 10870350]

## Supplemental Material

### Nurse-Performed Screening for Post-Extubation Dysphagia: A Before-And-After Study in Critically-Ill Medical Patients

See KC<sup>1,2</sup>, Peng SY<sup>2</sup>, Phua J<sup>1,2</sup>, Sum CL<sup>3</sup>, Concepcion J<sup>4</sup>

<sup>1</sup>Division of Respiratory & Critical Care Medicine, University Medicine Cluster, National University Health System, Singapore

<sup>2</sup>Yong Loo Lin School of Medicine, National University of Singapore, Singapore

<sup>3</sup>Department of Nursing, National University Hospital, Singapore

<sup>4</sup>Department of Rehabilitation, National University Hospital, Singapore

e-TABLE 1. Questions and answers for the written test

| No. | Question                                                                                                                                        | Answer                                                                                               |
|-----|-------------------------------------------------------------------------------------------------------------------------------------------------|------------------------------------------------------------------------------------------------------|
| 1   | This refers to difficulties in moving the food from the mouth down to the stomach through the esophagus                                         | Dysphagia                                                                                            |
| 2   | Give two signs of aspiration                                                                                                                    | Coughing<br>Throat clearing<br>Choking<br>Desaturation                                               |
| 3   | Give two complications of aspiration                                                                                                            | Pneumonia<br>Dehydration<br>Malnutrition                                                             |
| 4   | Using the Massey Protocol, how many ml of water is given to the patient when no signs of aspiration were observed after drinking 5 ml of water? | 60 ml                                                                                                |
| 5   | Give one exclusion criteria for the water swallow test                                                                                          | Patients on tracheostomy tube                                                                        |
| 6   | Give one inclusion criteria for the water swallow test                                                                                          | Successfully Extubated<br>Planned for oral feeding (as advised by at least a Registrar)              |
| 7   | Give one readiness criteria for the water swallow test                                                                                          | Alert<br>Cooperative<br>Able to sit up in bed<br>Maintain SpO <sub>2</sub> 90% and above without NIV |
| 8   | The patient passed the water swallow test. He has no teeth. What diet texture will you recommend this patient to start with?                    | Finely minced diet or blended diet                                                                   |
