# Supplementary material for: Nurse-performed screening for postextubation dysphagia: a retrospective cohort study in critically ill medical patients
Source: Springer Nature journal article supplement (doi:10.1186/s13054-016-1507-y), 2016-10-12
Supplement: MOESM4 [file 10870350]

## Supplemental Material

### **Nurse-Performed Screening for Post-Extubation Dysphagia: A Before-And-After Study in Critically-Ill Medical Patients**

See KC<sup>1,2</sup>, Peng SY<sup>2</sup>, Phua J<sup>1,2</sup>, Sum CL<sup>3</sup>, Concepcion J<sup>4</sup>

<sup>1</sup>Division of Respiratory & Critical Care Medicine, University Medicine Cluster, National University Health System, Singapore

<sup>2</sup>Yong Loo Lin School of Medicine, National University of Singapore, Singapore

<sup>3</sup>Department of Nursing, National University Hospital, Singapore

<sup>4</sup>Department of Rehabilitation, National University Hospital, Singapore

**Nurse-Performed Screening for Post-Extubation Dysphagia  
Nursing Competency Assessment Form**

Name: \_\_\_\_\_  
Employee No.: \_\_\_\_\_

Designation: \_\_\_\_\_  
Ward No.: \_\_\_\_\_

| S/N                | Criteria                                                                                                          | Test 1 | Test 2 | Test 3 | Test 4 | Test 5 | Comments |
|--------------------|-------------------------------------------------------------------------------------------------------------------|--------|--------|--------|--------|--------|----------|
| <b>PREPARATION</b> |                                                                                                                   |        |        |        |        |        |          |
| 1                  | Determines patient's identity (name and identity number)                                                          |        |        |        |        |        |          |
| 2                  | Determines from the team doctor (Registrar & above) that the patient is planned for oral feeding after extubation |        |        |        |        |        |          |
| 3                  | Checks if patient has tracheostomy tube                                                                           |        |        |        |        |        |          |
| 4                  | Determines patient's ability to:                                                                                  |        |        |        |        |        |          |
|                    | a. to remain alert for the screening                                                                              |        |        |        |        |        |          |
|                    | b. to cooperate with the screening                                                                                |        |        |        |        |        |          |
|                    | c. to be propped up in bed for the screening                                                                      |        |        |        |        |        |          |
|                    | d. maintain SPO2 >90% without non-invasive ventilation                                                            |        |        |        |        |        |          |
| 5                  | Prepares materials                                                                                                |        |        |        |        |        |          |
|                    | a. teaspoon                                                                                                       |        |        |        |        |        |          |
|                    | b. water                                                                                                          |        |        |        |        |        |          |
|                    | c. measuring/ medicine cup                                                                                        |        |        |        |        |        |          |
|                    | d. Dysphagia Screening Form                                                                                       |        |        |        |        |        |          |
|                    | e. Pen                                                                                                            |        |        |        |        |        |          |
| 6                  | Clearly explains to the patient:                                                                                  |        |        |        |        |        |          |
|                    | a. the purpose of the screening                                                                                   |        |        |        |        |        |          |
|                    | b. the test procedures                                                                                            |        |        |        |        |        |          |
| <b>PERFORMANCE</b> |                                                                                                                   |        |        |        |        |        |          |
| 7                  | Positions patient appropriately                                                                                   |        |        |        |        |        |          |
| 8                  | Commences dysphagia screening by giving patient 5 ml water by spoon                                               |        |        |        |        |        |          |
| 9                  | Identifies signs of aspiration observed                                                                           |        |        |        |        |        |          |
|                    | a. drooling                                                                                                       |        |        |        |        |        |          |
|                    | b. choking                                                                                                        |        |        |        |        |        |          |
|                    | c. gurgling sounds                                                                                                |        |        |        |        |        |          |
|                    | d. coughing                                                                                                       |        |        |        |        |        |          |
| 10                 | If signs of aspiration present:                                                                                   |        |        |        |        |        |          |
|                    | a. discontinues the screening immediately                                                                         |        |        |        |        |        |          |
|                    | b. Aware of next steps (keeps the patient NBM, informs the doctor, await further advise from doctors)             |        |        |        |        |        |          |

|                              |                                                                                                                                                           |                                           |  |  |  |  |  |
|------------------------------|-----------------------------------------------------------------------------------------------------------------------------------------------------------|-------------------------------------------|--|--|--|--|--|
| 11                           | If no signs of aspiration present, proceeds with the dysphagia screening by giving patient 60 ml water by cup.                                            |                                           |  |  |  |  |  |
| 12                           | Identifies signs of aspiration observed                                                                                                                   |                                           |  |  |  |  |  |
|                              | a. Drooling                                                                                                                                               |                                           |  |  |  |  |  |
|                              | b. choking                                                                                                                                                |                                           |  |  |  |  |  |
|                              | c. gurgling sounds                                                                                                                                        |                                           |  |  |  |  |  |
|                              | d. coughing                                                                                                                                               |                                           |  |  |  |  |  |
| 13                           | If signs of aspiration present:                                                                                                                           |                                           |  |  |  |  |  |
|                              | a. discontinues the screening immediately                                                                                                                 |                                           |  |  |  |  |  |
|                              | b. aware of next steps (keeps the patient NBM, informs the doctor, await further advice from doctors)                                                     |                                           |  |  |  |  |  |
| 14                           | If no signs of aspiration present:                                                                                                                        |                                           |  |  |  |  |  |
| 15                           | a. informs doctors of screening results and await further advice.                                                                                         |                                           |  |  |  |  |  |
|                              | b. appropriate diet recommendations given for patients who are appropriate to commence oral feeding (dentate: chopped diet; edentate: finely minced diet) |                                           |  |  |  |  |  |
| <b>FOLLOW UP</b>             |                                                                                                                                                           |                                           |  |  |  |  |  |
| 16                           | For patients who are to commence oral feeding:                                                                                                            |                                           |  |  |  |  |  |
|                              | a. supervises first meal to observe for signs of aspiration                                                                                               |                                           |  |  |  |  |  |
|                              | b. documents supervision of the first meal                                                                                                                |                                           |  |  |  |  |  |
| 17                           | For patient who fail the dysphagia screening test and requires referral to speech therapist: informs doctor to order referral                             |                                           |  |  |  |  |  |
| 18                           | Files Dysphagia Screening Form in the appropriate section of the case notes                                                                               |                                           |  |  |  |  |  |
| 19                           | Documents findings in the case notes                                                                                                                      |                                           |  |  |  |  |  |
| Overall result               |                                                                                                                                                           | <b>Competency ACHIEVED / NOT ACHIEVED</b> |  |  |  |  |  |
| Assessor's Name/ Designation |                                                                                                                                                           |                                           |  |  |  |  |  |
| Signature                    |                                                                                                                                                           |                                           |  |  |  |  |  |
| Date                         |                                                                                                                                                           |                                           |  |  |  |  |  |
