# Supplementary material for: Nurse-performed screening for postextubation dysphagia: a retrospective cohort study in critically ill medical patients
Source: Springer Nature journal article supplement (doi:10.1186/s13054-016-1507-y), 2016-10-12

## Supplemental Material

### **Nurse-Performed Screening for Post-Extubation Dysphagia: A Before-And-After Study in Critically-Ill Medical Patients**

See KC<sup>1,2</sup>, Peng SY<sup>2</sup>, Phua J<sup>1,2</sup>, Sum CL<sup>3</sup>, Concepcion J<sup>4</sup>

<sup>1</sup>Division of Respiratory & Critical Care Medicine, University Medicine Cluster, National University Health System, Singapore

<sup>2</sup>Yong Loo Lin School of Medicine, National University of Singapore, Singapore

<sup>3</sup>Department of Nursing, National University Hospital, Singapore

<sup>4</sup>Department of Rehabilitation, National University Hospital, Singapore

e-FIGURE 2. Post-extubation oral feeding and pneumonia outcomes

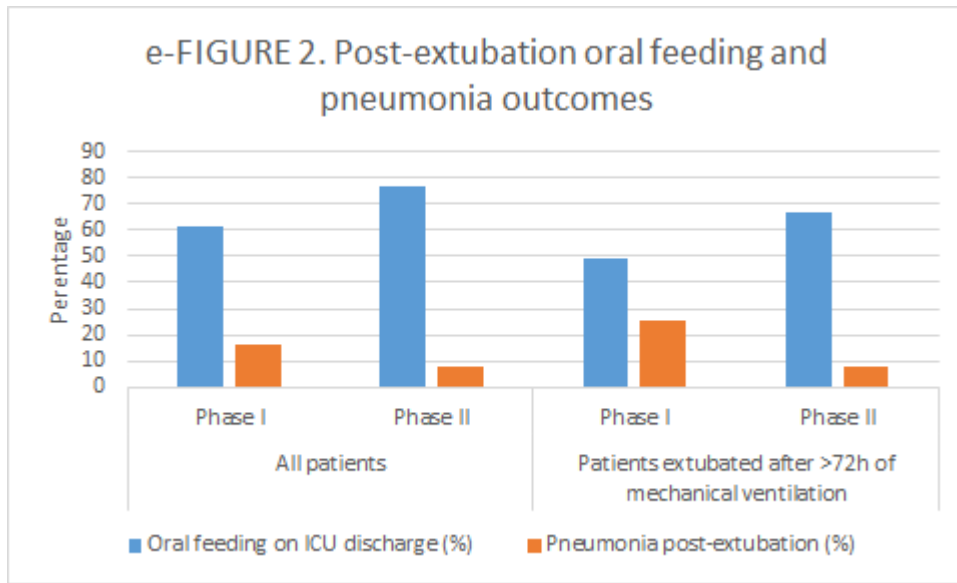

Supplement: MOESM5 [file 10870350]
