# Supplementary material for: Nurse-performed screening for postextubation dysphagia: a retrospective cohort study in critically ill medical patients
Source: Springer Nature journal article supplement (doi:10.1186/s13054-016-1507-y), 2016-10-12
Supplement: MOESM6 [file 10870350]

## Supplemental Material

### **Nurse-Performed Screening for Post-Extubation Dysphagia: A Before-And-After Study in Critically-Ill Medical Patients**

See KC<sup>1,2</sup>, Peng SY<sup>2</sup>, Phua J<sup>1,2</sup>, Sum CL<sup>3</sup>, Concepcion J<sup>4</sup>

<sup>1</sup>Division of Respiratory & Critical Care Medicine, University Medicine Cluster, National University Health System, Singapore

<sup>2</sup>Yong Loo Lin School of Medicine, National University of Singapore, Singapore

<sup>3</sup>Department of Nursing, National University Hospital, Singapore

<sup>4</sup>Department of Rehabilitation, National University Hospital, Singapore

e-TABLE 2. Correlation between swallowing screen and oral feeding on ICU discharge

|                                             | Passed swallowing screen | Did not pass swallowing screen <sup>a</sup> | Total |
|---------------------------------------------|--------------------------|---------------------------------------------|-------|
| <b>On oral feeding on ICU discharge</b>     | 136                      | 8                                           | 144   |
| <b>Not on oral feeding on ICU discharge</b> | 7                        | 36                                          | 43    |
| <b>Total</b>                                | 143                      | 44                                          | 187   |

Overall correlation =  $172/187 \times 100\% = 92.0\%$

<sup>a</sup> Includes patients who failed the swallowing screen overall and patients who missed all three days of screening
